# Supplementary material for: An integrated multimodal model of alcohol use disorder generated by data-driven causal discovery analysis
Source: PubMed Central journal article supplement (PMC8012376; doi:10.1038/s42003-021-01955-z), 2021-03-31
Supplement: 42003_2021_1955_MOESM3_ESM.pdf [file 42003_2021_1955_MOESM3_ESM.pdf]

## Description of Additional Supplementary Files

**File name:** Supplementary Data 1

**Description:** Parallel Analysis to determine number of factors for EFA.

**File name:** Supplementary Data 2

**Description:** Factor loadings from EFA of HCP data. Factor loadings  $>.3$  are highlighted for visibility.

**File name:** Supplementary Data 3

**Description:** Factor loadings from EFA of HCP data following standardization (z-scoring). Factor loadings  $>.3$  are highlighted for visibility.

**File name:** Supplementary Data 4

**Description:** Correlation structure of factors.

**File name:** Supplementary Data 5

**Description:** Resampling stability of graph edges.

**File name:** Supplementary Data 6

**Description:** List of included and excluded variables.

**File name:** Supplementary Data 7

**Description:** Descriptive statistics of the included variables.

**File name:** Supplementary Data 8

**Description:** Data used for GFCI Model Fitting and SEM Fitting.
